# Supplementary material
Source: Royal Society of Chemistry journal article supplement (doi:10.1039/d6gc00330c)
Supplement: d6gc00330c1.pdf [file d6gc00330c1.pdf]

## Supporting information

### A Type III porous liquid with high separation performance for linear/branched C<sub>4</sub> olefin mixtures

Qiuwei Ma,<sup>a</sup> Bei Liu<sup>a</sup>, Chun Deng, Jie Zhang,<sup>b</sup> Changyu Sun,<sup>a</sup> Yun-Lei Peng,<sup>\*a</sup> and Guangjin Chen<sup>\*a</sup>

<sup>a</sup>State Key Laboratory of Heavy Oil Processing, Department of Applied Chemistry, College of Chemical Engineering and Environment, China University of Petroleum, Beijing 102249, China.

<sup>b</sup>Tianjin Institute of Industrial Biotechnology, Chinese Academy of Sciences, Tianjin 300308, China.

Corresponding Email: [gjchen@cup.edu.cn](mailto:gjchen@cup.edu.cn), [ylpeng@cup.edu.cn](mailto:ylpeng@cup.edu.cn).

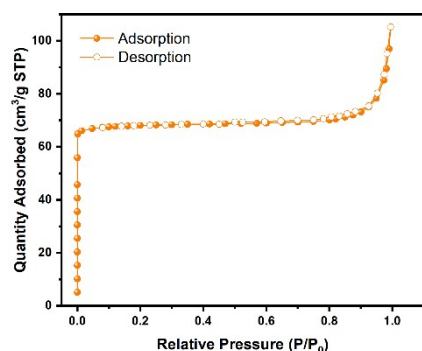

Figure S1. N<sub>2</sub> adsorption-desorption isotherm on CALF-20M at 77 K.

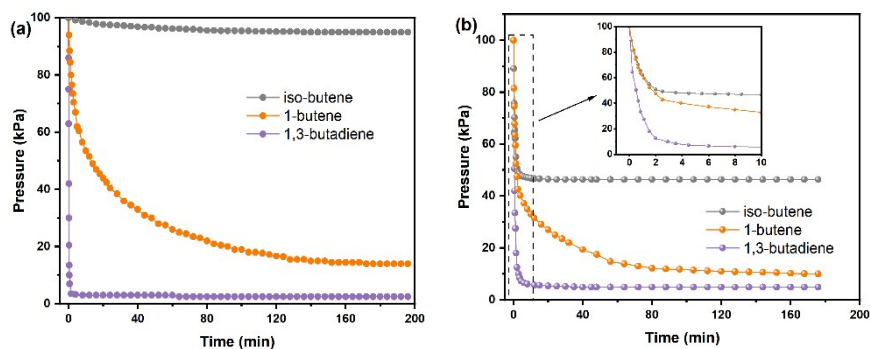

Figure S2. (a) Pressure drop profiles for C<sub>4</sub> olefin adsorption on CALF-20M nanoparticles at 293.2 K with an initial pressure of 100 kPa (initial gas-solid ratio is 49.7). (b) Pressure drop profiles for C<sub>4</sub> olefin sorption by 30 wt% CALF-20M/DMI PLs at 293.2 K with an initial pressure of 100 kPa (initial gas-liquid ratio is 10.4) and a stirring rate of 55 rpm.

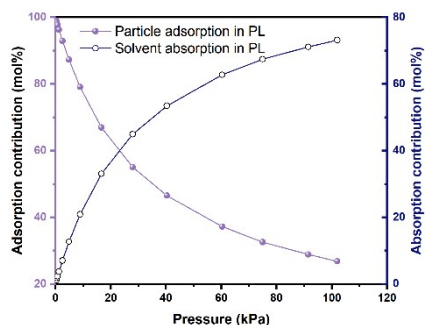

Figure S3. Contributions from adsorption and absorption sides to 1,3-butadiene uptake of the PLs at 293.2 K.

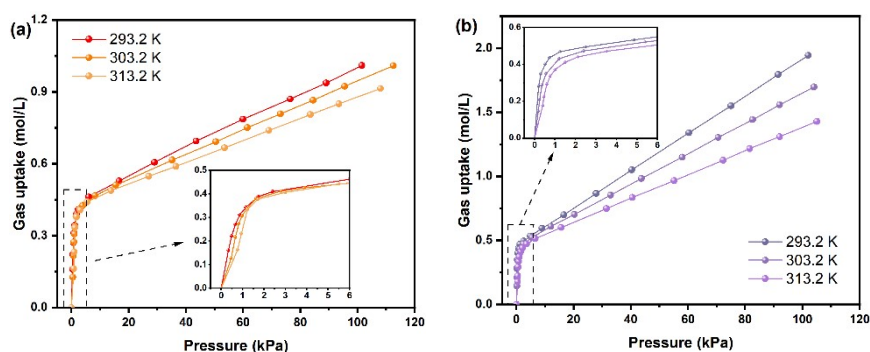

Figure S4. Sorption isotherms of 30 wt% CALF-20M/DMI PLs at different temperatures for (a) 1-butene and (b) 1,3-butadiene.

Table S1. Effect of sorption time on mixed gas separation using CALF-20M/DMI PLs at 303.2 K, a gas-liquid ratio of 15.2, and a stirring rate of 55 rpm.

| Gas mixtures                       | Time min | $P_E$ kPa | $S_{C1}$ mol/L/kPa | $S_{C2}$ mol/L kPa | $y_1$ mol% | $x_1$ mol% | $R_1$ % | $\beta$ |
|------------------------------------|----------|-----------|--------------------|--------------------|------------|------------|---------|---------|
| 1-butene(1)<br>/iso-butene(2)      | 3.5      | 61.2      | 0.0098             | 0.0045             | 38.8       | 57.8       | 68.8    | 2.2     |
|                                    | 7        | 54.5      | 0.0156             | 0.0046             | 31.1       | 60.6       | 77.8    | 3.4     |
|                                    | 15       | 47.0      | 0.0316             | 0.0046             | 20.1       | 63.4       | 87.7    | 6.9     |
|                                    | 28       | 43.9      | 0.0582             | 0.0046             | 12.6       | 64.7       | 92.9    | 12.7    |
|                                    | 45       | 39.4      | 0.1839             | 0.0047             | 4.6        | 65.6       | 97.7    | 39.0    |
|                                    | 58*      | 38.0      | 0.2555             | 0.0049             | 3.5        | 65.3       | 98.3    | 52.5    |
| 1,3-butadiene(1)<br>/iso-butene(2) | 118      | 37.9      | 0.2606             | 0.0049             | 3.4        | 65.3       | 98.3    | 53.4    |
|                                    | 1.2      | 63.2      | 0.0323             | 0.0028             | 11.8       | 60.5       | 87.9    | 11.4    |
|                                    | 1.8      | 56.4      | 0.0752             | 0.0033             | 6.1        | 60.2       | 94.4    | 23.1    |
|                                    | 2.7      | 51.1      | 0.1293             | 0.0038             | 4.0        | 58.6       | 96.7    | 33.8    |
|                                    | 5        | 47.4      | 0.2959             | 0.0043             | 1.9        | 57.4       | 98.5    | 68.1    |

|            |      |        |        |     |      |      |       |
|------------|------|--------|--------|-----|------|------|-------|
| <b>15</b>  | 43.5 | 0.5749 | 0.0049 | 1.1 | 55.9 | 99.2 | 115.6 |
| <b>23*</b> | 40.3 | 0.7963 | 0.0058 | 0.8 | 54.3 | 99.5 | 137.9 |
| <b>83</b>  | 40.3 | 0.7977 | 0.0058 | 0.8 | 54.3 | 99.4 | 138.4 |

\* Reaching the thermodynamic equilibrium state

Table S2. The reported membrane separation technology's selectivity for C<sub>4</sub> olefins.

| Membrane                                                                                   | Testing conditions | Selectivity                  |                         | Ref |
|--------------------------------------------------------------------------------------------|--------------------|------------------------------|-------------------------|-----|
|                                                                                            |                    | 1,3-butadiene/<br>Iso-butene | 1-butene/<br>Iso-butene |     |
| P2533                                                                                      | 306 K, 50 kPa      | 2.8                          | 1.2                     | 1   |
| P1500                                                                                      | 306 K, 50 kPa      | 4.2                          | 1.2                     |     |
| P4000                                                                                      | 306 K, 50 kPa      | 4.5                          | 1.2                     |     |
| ZSM-5 membrane                                                                             | 403 K, 100 kPa     | -                            | 10                      | 2   |
| polyZIF(4:1)membrane                                                                       | 298 K, 100 kPa     | 28.1                         | -                       | 3   |
| zeolite CGC membrane-1<br>a <sub>g</sub> (ZIF-62) <sub>0.7</sub> /(SAPO-34) <sub>0.3</sub> | 298 K, 100 kPa     | 6.44                         | -                       | 4   |
| zeolite CGC membrane-2<br>a <sub>g</sub> (ZIF-62) <sub>0.7</sub> /(SSZ-13) <sub>0.3</sub>  | 298 K, 100 kPa     | 10.31                        | -                       |     |

Table S3. Selectivity comparison of 1-butene/iso-butene and 1,3-butadiene/iso-butene binary mixture with the solid adsorbents.

| Adsorption medium | T (K)  | Gas uptake at 100 kpa*<br>mmol/g |      |      | Uptake ratio |         | Selectivity** |          | Ref       |
|-------------------|--------|----------------------------------|------|------|--------------|---------|---------------|----------|-----------|
|                   |        | (1)                              | (2)  | (3)  | (1)/(3)      | (2)/(3) | (1)/(3)       | (2)/(3)  |           |
| CALF-20M          | 293.15 | 1.48                             | 1.38 | 0.09 | 17.41        | 16.23   | -             | 11159.40 | This work |
| CALF-20M/DMI PLs  | 293.15 | 1.66                             | 0.86 | 0.46 | 3.65         | 1.85    | 294.87        | 122.52   |           |
| GeFSIX-2-Cu-i     | 298.15 | 3.63                             | 3.26 | 1.23 | 2.95         | 2.65    | 5.4(H)        | 1.4(H)   | 5         |
| SIFSIIX-2-Cu-i    | 298.15 | 3.99                             | 2.98 | 1.53 | 2.61         | 1.95    | 4.6(H)        | 1.5(H)   |           |
| NbFSIX-2-Cu-i     | 298.15 | 2.61                             | 2.24 | 0.45 | 5.8          | 4.98    | 142(H)        | 138(H)   |           |
| GeFSIX-14-Cu-i    | 298.15 | 2.59                             | 0.54 | 0.44 | 5.89         | 1.23    | 111(H)        | 1.3(H)   |           |
| Y-fum-fcu-MOF     | 303.15 | 3.41                             | 2.70 | 0.98 | 3.48         | 2.76    | 5.29          | 3.57     | 6         |

|                |        |      |      |       |        |       |           |           |    |
|----------------|--------|------|------|-------|--------|-------|-----------|-----------|----|
| TMOF-1         | 298.15 | 1.64 | 1.09 | 0.21  | 7.81   | 5.19  | -         | 83(I)     | 7  |
| SOFOUR-DPDS-Ni | 298.15 | 1.68 | 1.48 | 0.17  | 9.88   | 8.7   | 2321.8(H) | 233.5(H)  | 8  |
| Mg-gallate     | 298.15 | 1.94 | 1.43 | 0.145 | 13.38  | 9.86  | 106(H)    | 29(H)     | 9  |
| Co-gallate     | 298.15 | 1.86 | 0.88 | 0.145 | 12.827 | 6.06  | 63(H)     | 40(H)     |    |
| Ni-gallate     | 298.15 | 1.38 | 0.56 | 0.10  | 13.8   | 5.6   | 148(H)    | 67(H)     |    |
| Zu-36-Co       | 298.15 | -    | 2.01 | 0.22  | -      | 9.13  | -         | 2050(I)   | 10 |
| MET-Fe         | 298.15 | -    | 1.56 | 0.558 | -      | 2.795 | -         | 699.30(I) |    |

\*The above table assigns numbers to gases as follows: (1) refers to 1,3-butadiene; (2) refer to 1-butene; (3) refer to iso-butene.

\*\*H stands for Henry's selectivity, and I indicates the IAST selectivity, and the unmarked ones represent the selectivity measured in the experiment.

## Reference

1. M. Rahman, *J. Membr. Sci.*, 2023, 666, 121176.
2. C. Chmelik , H. Bux , H. Voss and J. Caro, *Chem. Ing. Tech.*, 2011, 83, 104–112.
3. N. Li , C. Ma , J. Zhang , L. Xu , S. Wang , Z. Wang , S. Zhang , J. Pang , J. Hou , Z. Qiao and C. Zhong, *Angew. Chem. Int. Ed.*, 2025, 64, e202506117.
4. D. Ao , Z. Yang , A. Chen , Y. Sun , M. Ye , L. Tian , X. Cen , Z. Xie , J. Du , Z. Qiao , A. Cheetham , J. Hou and C. Zhong, *Angew. Chem. Int. Ed.*, 2024, 63, e202401118.
5. Z. Zhang , Q. Yang , X. Cui , L. Yang , Z. Bao , Q. Ren and H. Xing, *Angew. Chem. Int. Ed.*, 2017, 56, 16282–16287.
6. A. Assen , T. Viridis , W. De Moor , A. Moussa , M. Eddaoudi , G. Baron , J. Denayer and Y. Belmabkhout, *Chem. Eng. J.*, 2021, 413, 127388.
7. J. Cui , Z. Zhang , J. Hu , L. Yang , Y. Li , L. Chen , X. Cui and H. Xing, *Chem. Eng. J.*, 2021, 425, 130580.
8. J. Liu , H. Xiong , H. Shuai , X. Liu , Y. Peng , L. Wang , P. Wang , Z. Zhao , Z. Deng , Z. Zhou , J. Chen , S. Chen , Z. Zeng , S. Deng and J. Wang, *Nat. Commun.*, 2024, 15, 2222.
9. J. Chen , J. Wang , L. Guo , L. Li , Q. Yang , Z. Zhang , Y. Yang , Z. Bao and Q. Ren, *Appl. Mater. Interfaces*, 2020, 12, 9609–9616.
10. Y. Jiang , C. Deng , C. Liang , X. Peng , Z. Zhang , L. Zhao , X. Wu , J. Zou , Y. Jia , M. Cheng , J. Li , J. Zhang , Y. Peng , M. Gao , G. Chen and M. Zaworotko, *ACS Materials Lett*, 2024, 6, 4972–4979.
